# Supplementary material for: A liter-scale microbial capacitive deionization system for the treatment of shale gas wastewater
Source: Royal Society of Chemistry journal article supplement (doi:10.1039/c5ew00211g), 2016-01-01
Supplement: c5ew00211g1.pdf [file c5ew00211g1.pdf]

Date: September 10, 2015

### **Supporting Information**

#### **A Liter-scale Microbial Capacitive Deionization System for the Treatment of Shale Gas Wastewater**

Casey Forrestal<sup>1</sup>, Alexander Haeger<sup>1</sup>, Louis Dankovich IV<sup>1</sup>, Tzahi Y. Cath<sup>2</sup>  
Zhiyong Jason Ren<sup>1\*</sup>

<sup>1</sup>Department of Civil, Environmental, and Architectural Engineering, University of Colorado  
Boulder, Boulder, CO 80309

<sup>2</sup>Department of Civil and Environmental Engineering, Colorado School of Mines, Golden, CO  
80401

\*Corresponding author: [jason.ren@colorado.edu](mailto:jason.ren@colorado.edu); Phone: (303) 492-4137;

Fax: (303) 492-7317

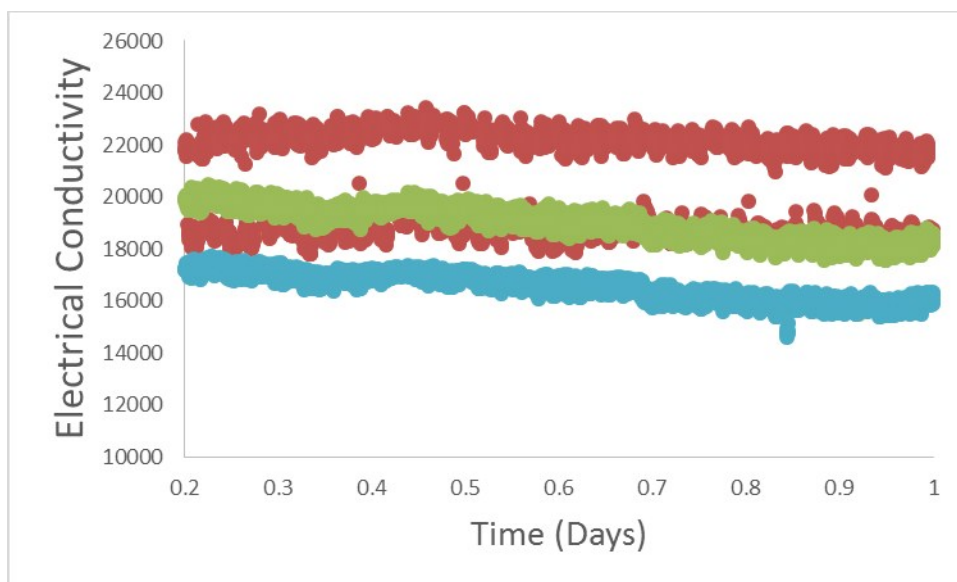

Figure S1. Change in conductivity ( $\mu\text{s}/\text{cm}$ ) for anode, desalination and cathode chamber over the course of a day. Red icons are for desalination/regeneration of the desalination chamber, Green is for Cathode chamber and Blue correlates to the anode chamber.
